# Supplementary material for: Fine mapping of the QTL cqSPDA2 for chlorophyll content in Brassica napus L
Source: PubMed Central journal article supplement (PMC7654151; doi:10.1186/s12870-020-02710-y), 2020-11-09
Supplement: 12870_2020_2710_MOESM1_ESM.pdf [file 12870_2020_2710_MOESM1_ESM.pdf]

**Additional file 1: Table S1.** Genotyping of *cqSPDA2* in BC<sub>6</sub>F<sub>1</sub> population.

| Marker   | AA | aa  | total | Expectation | $\chi^2$ | P value |
|----------|----|-----|-------|-------------|----------|---------|
| SSR2     | 90 | 108 | 198   | 1:1         | 1.46     | 0.73    |
| Indel100 | 89 | 109 | 198   | 1:1         | 1.82     | 0.91    |

AA indicates the number of plant from the homozygous dominant genotype with *cqSPDA2*; aa indicates the number of plant from homozygous recessive genotype without *cqSPDA2*
