# Supplementary material for: Fine mapping of the QTL cqSPDA2 for chlorophyll content in Brassica napus L
Source: PubMed Central journal article supplement (PMC7654151; doi:10.1186/s12870-020-02710-y), 2020-11-09
Supplement: 12870_2020_2710_MOESM2_ESM.pdf [file 12870_2020_2710_MOESM2_ESM.pdf]

**Additional file 2: Table S2.** Primer sequences designed in this study.

| Marker         | Marker Type  | Forward primer (5'-3')       | Reverse primer (5'-3')        |
|----------------|--------------|------------------------------|-------------------------------|
| <b>Indel1</b>  | <b>InDel</b> | <b>AAATCTACATCACACCAAAGC</b> | <b>GCCTTGTTGGGTCTTTTAT</b>    |
| <b>Indel3</b>  | <b>InDel</b> | <b>GTCCACACCAAATCCACTAC</b>  | <b>TGCTAGGAGAAACAACCTGT</b>   |
| <b>Indel6</b>  | <b>InDel</b> | <b>ACATACTTTGATGCCTTGGT</b>  | <b>ACTCTGAGGTTTTCAAGCAG</b>   |
| <b>Indel15</b> | <b>InDel</b> | <b>AACATCGCCATTGTAAGTCT</b>  | <b>CAACTGCAACACAACAATTT</b>   |
| <b>Indel17</b> | <b>InDel</b> | <b>AACAAAAGATCATTGCTTTCA</b> | <b>CATGGATATCACCTGAGAA</b>    |
| <b>Indel19</b> | <b>InDel</b> | <b>GCTGTTGTTGTCTGTGACAT</b>  | <b>AAACACCTCTCCTCCTCTTC</b>   |
| <b>Indel48</b> | <b>InDel</b> | <b>AAAGTAACAGACACATGGACG</b> | <b>CTGAAAGGTGAGAAATGGAG</b>   |
| <b>Indel52</b> | <b>InDel</b> | <b>TTCCCAGAGTCAGAAGAAGA</b>  | <b>CTCCTTATCTATGGAGCACG</b>   |
| <b>Indel56</b> | <b>InDel</b> | <b>TGCTTTCAGTAGCAAGGATT</b>  | <b>ACAAACCAATCATTCGAGTC</b>   |
| <b>Indel59</b> | <b>InDel</b> | <b>TGTTTGTTTGAAAAAGCTCA</b>  | <b>AAACCAAGAAAAACAAGGAA</b>   |
| <b>Indel63</b> | <b>InDel</b> | <b>GTATACACCAATTTTCGGGTC</b> | <b>CATCCAATGCTTCTCTTTCT</b>   |
| <b>Indel75</b> | <b>InDel</b> | <b>CAGCAATAATCCAAGTCACA</b>  | <b>GGTTAAACGATACTAACCGC</b>   |
| <b>Indel77</b> | <b>InDel</b> | <b>CAGTGGTAGACCTCCACAAT</b>  | <b>GCAAGACATATGATCCTTTCA</b>  |
| <b>Indel86</b> | <b>InDel</b> | <b>AATGATACCAACCCACCAC</b>   | <b>TGGAAGGTATAAAGTCTCATCC</b> |
| <b>Indel87</b> | <b>InDel</b> | <b>TCTTTCTGCTCAAAGGTTGT</b>  | <b>AGGGTTTAAAAAGTCCCAAC</b>   |
| Indel2         | InDel        | TATAAAAGACCCAACAAGGC         | GTAGTGGATTTGGTGTGGAC          |
| Indel4         | InDel        | TAATAAGGCCATAAGCATCC         | CTCCCTTGAGAAATGAAAAA          |
| Indel10        | InDel        | TAActCAAGTCTCCCCGTTA         | GAGAAACAAGACCGTGAAGA          |
| Indel24        | InDel        | TTGGGAGAGCGAAATAAATA         | AGTATGCGCTTTTGATTTTT          |
| Indel37        | InDel        | CGCCATAGATTCTCAGTTCT         | GATGTGAGGGAAAATAAACG          |
| Indel38        | InDel        | TTTTTATTGGGTCCCTTTTT         | TTCAAACCAATTCTTCTTTCA         |
| Indel41        | InDel        | CAATCCTCCTTATCACCTCA         | CAGATATAAGCGGAGCAATC          |
| Indel44        | InDel        | AGGAACCAAATGAGAAGTCA         | AAAAATCATCAACCAATCAAA         |
| Indel61        | InDel        | TATGCGTATGCTGTTTCATC         | CATAACTGCAACATGCCTAA          |
| Indel70        | InDel        | ACCGAAAAATTATTTAGTATGA       | AGAATAGGTGATTAATCGTGA         |
| Indel73        | InDel        | ATTACGCGATCATTGTTTTT         | TAGAATGCCTTTCTTTTCGAG         |
| Indel76        | InDel        | AAGATCGGAGAATGAAAACA         | TCTAGAACGATCGGCTACAT          |
| Indel81        | InDel        | AAAGTTCGACAAAATTGGTG         | CAATGATTTCGTA CTTCATGT        |

15 markers that tightly linked with the *cqSPDA2* locus are displayed in bold.
