# Supplementary material for: Fine mapping of the QTL cqSPDA2 for chlorophyll content in Brassica napus L
Source: PubMed Central journal article supplement (PMC7654151; doi:10.1186/s12870-020-02710-y), 2020-11-09
Supplement: 12870_2020_2710_MOESM4_ESM.pdf [file 12870_2020_2710_MOESM4_ESM.pdf]

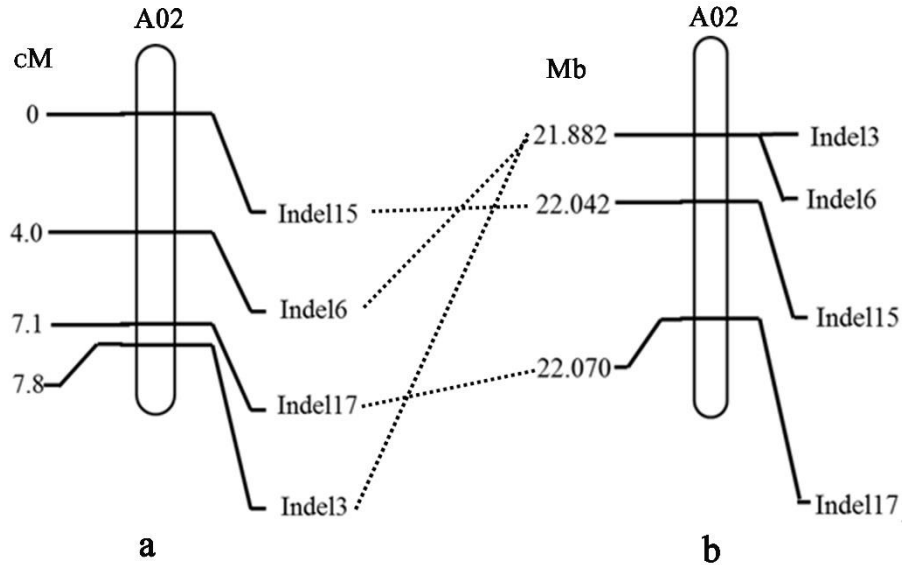

**Additional file 4: Figure S2** The local genetic linkage map and physical map of *cqSPDA2* on chromosome A02 in BC<sub>3</sub>F<sub>2</sub> population. **a** The local genetic linkage map. **b** The physical map.
