# Supplementary material for: Fine mapping of the QTL cqSPDA2 for chlorophyll content in Brassica napus L
Source: PubMed Central journal article supplement (PMC7654151; doi:10.1186/s12870-020-02710-y), 2020-11-09
Supplement: 12870_2020_2710_MOESM5_ESM.pdf [file 12870_2020_2710_MOESM5_ESM.pdf]

**Additional file 5: Table S3.** Primer sequences designed in this study.

| Marker   | Marker Type | Forward primer (5'-3') | Reverse primer (5'-3') |
|----------|-------------|------------------------|------------------------|
| SSR2     | SSR         | CATGCCACAAAGATCAATCG   | ATCTGGTTCACGGGTGTCTC   |
| Indel95  | InDel       | TCATCTCATGCAACAATGTC   | CCTCTTGGTGCTACAGGTTA   |
| Indel96  | InDel       | GAAAAGATATCGACTGTGCC   | AATGCAGATTAGCTTCTCCA   |
| Indel98  | InDel       | GGAAGTCTCAGCTCAGTTTG   | CCACACATCCACAATCTACA   |
| Indel100 | InDel       | GAGTCAAGAAAGACCATTGC   | TTGATTTCTTTCTTGGTTG    |
| Indel15  | InDel       | AACATCGCCATTGTAAGTCT   | CAACTGCAACACAACAATTT   |
| Indel3   | InDel       | GTCCACACCAAATCCACTAC   | TGCTAGGAGAAACAACCTGT   |
