# Supplementary material for: Fine mapping of the QTL cqSPDA2 for chlorophyll content in Brassica napus L
Source: PubMed Central journal article supplement (PMC7654151; doi:10.1186/s12870-020-02710-y), 2020-11-09
Supplement: 12870_2020_2710_MOESM6_ESM.pdf [file 12870_2020_2710_MOESM6_ESM.pdf]

**Additional file 6: Table S4.** Primer sequences of KASP designed in this study.

---

| Marker   | Sequence                                      |
|----------|-----------------------------------------------|
| BSNP88F1 | GAAGGTCGGAGTCAACGGATTAGAACTCCCTTGAGAAATGAAAA  |
| BSNP88F2 | GAAGGTGACCAAGTTCATGCTAGAACTCCCTTGAGAAATGAAAG  |
| BSNP88R1 | GGTTGTTTCTCCTAGCATCTATGA                      |
| BSNP90F1 | GAAGGTCGGAGTCAACGGATTTGCACAAAGATCTGGTCTTTAATA |
| BSNP90F2 | GAAGGTGACCAAGTTCATGCTGCACAAAGATCTGGTCTTTAATG  |
| BSNP90R1 | ATGAAGATTCTGATGCCATGG                         |

---
