# Supplementary material for: Fine mapping of the QTL cqSPDA2 for chlorophyll content in Brassica napus L
Source: PubMed Central journal article supplement (PMC7654151; doi:10.1186/s12870-020-02710-y), 2020-11-09
Supplement: 12870_2020_2710_MOESM7_ESM.pdf [file 12870_2020_2710_MOESM7_ESM.pdf]

**Additional file 7: Table S5.** Genes in the mapping interval on the chromosome A02 and their orthologs in *Arabidopsis*.

| Gene ID              | Position (bp)            | Homologue in <i>A. thaliana</i> | Gene function                                                                             |
|----------------------|--------------------------|---------------------------------|-------------------------------------------------------------------------------------------|
| <i>BnaA02g30210D</i> | chrA02:21892059-21892443 | AT5G48490.1                     | Bifunctional inhibitor/lipid-transfer protein/seed storage 2S albumin superfamily protein |
| <i>BnaA02g30220D</i> | chrA02:21897708-21898935 | AT5G48500.1                     | Uncharacterized protein                                                                   |
| <i>BnaA02g30230D</i> | chrA02:21905151-21907039 | AT5G38220.3                     | Alpha/beta-Hydrolases superfamily protein                                                 |
| <i>BnaA02g30240D</i> | chrA02:21922533-21922881 | AT5G48560.1                     | Transcription factor <i>bHLH78</i>                                                        |
| <i>BnaA02g30250D</i> | chrA02:21923207-21926710 | AT4G16890.1                     | Disease resistance protein                                                                |
| <i>BnaA02g30260D</i> | chrA02:21926798-21930428 | AT5G51630.2                     | Disease resistance protein                                                                |
| <i>BnaA02g30270D</i> | chrA02:21934212-21936672 | AT5G48560.1                     | Putative <i>bHLH</i> transcription factor                                                 |
| <i>BnaA02g30280D</i> | chrA02:21936812-21936924 |                                 | PREDICTED: Brassica napus transcription factor <i>bHLH78</i> -like                        |
| <i>BnaA02g30290D</i> | chrA02:21938935-21940337 | AT5G48580.1                     | Peptidyl-prolyl cis-trans isomerase <i>FKBP15-2</i>                                       |
| <i>BnaA02g30300D</i> | chrA02:21944673-21951722 | AT5G51630.1                     | Disease resistance protein                                                                |
| <i>BnaA02g30310D</i> | chrA02:21955728-21958153 | AT3G07270.2                     | GTP cyclohydrolase I                                                                      |
| <i>BnaA02g30320D</i> | chrA02:21961765-21963075 | AT5G13930.1                     | Chalcone synthase                                                                         |
| <i>BnaA02g30330D</i> | chrA02:21979040-21981843 | AT1G14800.1                     | Predicted protein                                                                         |
| <i>BnaA02g30340D</i> | chrA02:21984480-21984810 | AT5G13930.1                     | Chalcone synthase                                                                         |
| <i>BnaA02g30350D</i> | chrA02:21985298-21987016 | AT5G48630.1                     | Cyclin-C1-2                                                                               |
| <i>BnaA02g30360D</i> | chrA02:21990969-21993198 | AT5G48640.1                     | Cyclin family protein                                                                     |
| <i>BnaA02g30370D</i> | chrA02:21993664-21994959 | AT5G48655.3                     | RING/U-box domain-containing protein                                                      |
| <i>BnaA02g30380D</i> | chrA02:21995437-21996668 | AT5G48660.1                     | PREDICTED: B-cell receptor-associated protein 31-like isoform X1                          |
| <i>BnaA02g30390D</i> | chrA02:21997365-21999287 | AT5G48720.2                     | Protein XRI1                                                                              |
| <i>BnaA02g30400D</i> | chrA02:22000709-22002975 | AT5G48760.2                     | 60S ribosomal protein L13A                                                                |
| <i>BnaA02g30410D</i> | chrA02:22004795-22006340 | AT4G38830.1                     | Cysteine-rich receptor-like protein kinase 26                                             |

**Additional file 7: Table S5.** Genes in the mapping interval on the chromosome A02 and their orthologs in *Arabidopsis*. (Continued)

| Gene ID              | Position (bp)            | Homologue in <i>A. thaliana</i> | Gene function                                       |
|----------------------|--------------------------|---------------------------------|-----------------------------------------------------|
| <i>BnaA02g30420D</i> | chrA02:22006708-22007330 | AT5G44620.1                     | Cytochrome P450                                     |
| <i>BnaA02g30430D</i> | chrA02:22016679-22018973 | AT5G48830.1                     | Unknown protein                                     |
| <i>BnaA02g30440D</i> | chrA02:22020346-22020772 | AT5G48840.1                     | Pantoate-beta-alanine ligase                        |
| <i>BnaA02g30450D</i> | chrA02:22021041-22023175 | AT5G48850.1                     | Male sterility MS5 family protein                   |
| <i>BnaA02g30460D</i> | chrA02:22041388-22042414 | AT5G48870.1                     | Sm-like protein                                     |
| <i>BnaA02g30470D</i> | chrA02:22042463-22045797 | AT5G48880.3                     | KAT5/PKT1/PKT2 peroxisomal 3-keto-acyl-CoA thiolase |
