# Supplementary material for: Fine mapping of the QTL cqSPDA2 for chlorophyll content in Brassica napus L
Source: PubMed Central journal article supplement (PMC7654151; doi:10.1186/s12870-020-02710-y), 2020-11-09
Supplement: 12870_2020_2710_MOESM8_ESM.pdf [file 12870_2020_2710_MOESM8_ESM.pdf]

**Additional file 8: Table S6.** Primers designed for qRT-PCR of genes in the mapping interval.

| Name of Primers | Sequence of primers       |
|-----------------|---------------------------|
| Actin7-F        | GCTGACCGTATGAGCAAAG       |
| Actin7-R        | AAGATGGATGGACCCGAC        |
| BnaA02g30210D-F | GAATCCAACGAACCCATCAA      |
| BnaA02g30210D-R | AATACCGAAAGAACCGAGCA      |
| BnaA02g30220D-F | GTTTGGAGGTTGGGACTGGA      |
| BnaA02g30220D-R | TGAGGGTAAGGAGGGTAGTGGT    |
| BnaA02g30230D-F | CCACCTTCTTACGCTTTCATTAC   |
| BnaA02g30230D-R | GCTCAAACATCTGACCCAAATC    |
| BnaA02g30240D-F | GATGATGAACGGAACGATGCT     |
| BnaA02g30240D-R | TTGACAGGGAGACTGGAGTTAG    |
| BnaA02g30250D-F | TAGCCGATTCCACCACCAT       |
| BnaA02g30250D-R | TTAGCACTTCAAGATCATCCACATC |
| BnaA02g30260D-F | TGCGTAATCTGAACTTCTACTT    |
| BnaA02g30260D-R | GTTCCCTCCCACTTCTCAA       |
| BnaA02g30270D-F | AAGTCAACGGAGCAACAACA      |
| BnaA02g30270D-R | CGATGAGTTCTCTGATAACGAAGC  |
| BnaA02g30290D-F | AGTGAGAAGCGGCGATGTT       |
| BnaA02g30290D-R | TTGGAGTGAAATGAGAGAGAAGAC  |
| BnaA02g30300D-F | TCCCATCGTATGATCTGGCTAT    |
| BnaA02g30300D-R | TTCTCCACCCACTCCTCCTT      |
| BnaA02g30310D-F | CCATCTGGTGTGCGCTGTTGT     |
| BnaA02g30310D-R | GCTCCGAACTTTCATCCTCAA     |
| BnaA02g30330D-F | TTACATCTACACGCCTATCCTT    |
| BnaA02g30330D-R | TACCACCACCACTGCTTGT       |
| BnaA02g30340D-F | ATGAGGAGGAAGGCAGTAGAG     |
| BnaA02g30340D-R | AGTCCGTCCAGTTGACATCT      |
| BnaA02g30350D-F | TGTAACCTATATGCGCCGTGT     |
| BnaA02g30350D-R | AGATACAAGCAAGTGGGAGCA     |
| BnaA02g30360D-F | TGGACCTCATTCTTGTACACCC    |
| BnaA02g30360D-R | ACCATGCAGTGATGTCTTTCTCT   |
| BnaA02g30370D-F | TGAGAGCAACACGTGGCAT       |
| BnaA02g30370D-R | GGAACAGGCTGAGAAGAAGGTA    |
| BnaA02g30380D-F | TGTTTCGTGGAGGGTGCTATT     |
| BnaA02g30380D-R | CATCTTCATCTGGTCAAGGCTT    |
| BnaA02g30390D-F | CCTGTAGCGAGTCGGGTTAT      |
| BnaA02g30390D-R | AAAGGGTTGTTTCCATAGGCT     |
| BnaA02g30400D-F | TCAACGGGCAGAAGGTAGTC      |
| BnaA02g30400D-R | AGGAGCACGAAAGTGAATAGGT    |
| BnaA02g30410D-F | GACTGGTAGGAGAATGAAGAAGCTT |
| BnaA02g30410D-R | GCAGGTAGGAGAACACATAACT    |
| BnaA02g30420D-F | TCGGTGGTACGGATACATCA      |
| BnaA02g30420D-R | GCGGTGAGGATTAAGGAGTG      |
| BnaA02g30430D-F | TGATTCTGACACTGCGATGACT    |
| BnaA02g30430D-R | CAAGCTCAGGTCATAGCAGGA     |
| BnaA02g30450D-F | TCAGATGGTTGAGCCAGACG      |
| BnaA02g30450D-R | TAGCCGACGAGGTAACGAAG      |

**Additional file 8: Table S6.** Primers designed for qRT-PCR of genes in the mapping interval.  
(Continued)

| Name of Primers | Sequence of primers     |
|-----------------|-------------------------|
| BnaA02g30460D-F | GGTGCATAGGGTCGAAGATAAG  |
| BnaA02g30460D-R | TAAACGTCGAAGCCTTTGAGA   |
| BnaA02g30470D-F | ACCTTGCAGGACTCAAAGTTAGC |
| BnaA02g30470D-R | CCAATAGCAATGGCTCCTCC    |
