# Supplementary material for: Fine mapping of the QTL cqSPDA2 for chlorophyll content in Brassica napus L
Source: PubMed Central journal article supplement (PMC7654151; doi:10.1186/s12870-020-02710-y), 2020-11-09
Supplement: 12870_2020_2710_MOESM9_ESM.pdf [file 12870_2020_2710_MOESM9_ESM.pdf]

**Additional file 9: Table S7.** Gene expression in the mapping interval on A02.

|               | BnaA02g30210D                                      | BnaA02g30220D | BnaA02g30230D | BnaA02g30240D | BnaA02g30250D | BnaA02g30260D | BnaA02g30270D | BnaA02g30290D |            |
|---------------|----------------------------------------------------|---------------|---------------|---------------|---------------|---------------|---------------|---------------|------------|
|               | QU <sup>a</sup>                                    | 1             | 1             | 1             | 1             | 1             | 1             | 1             |            |
| 4-leaf stage  | ZS11 <sup>b</sup>                                  | 17.6494568    | 1.3505903     | 1.36363693    | 2.75499998    | 0.76040653    | 8.95383502    | 1.74038905    | 2.40528789 |
|               | BC <sub>4</sub> F <sub>2:3</sub> (AA) <sup>c</sup> | 3.53396463    | 1.18319532    | 0.66638786    | 2.47095822    | 0.40086701    | 0.8052987     | 1.63652724    | 1.4923762  |
|               | BC <sub>4</sub> F <sub>2:3</sub> (aa) <sup>d</sup> | 0.48933639    | 1.27355549    | 1.17724768    | 5.02551873    | 0.59835695    | 6.28334716    | 1.7064745     | 2.31934263 |
|               | QU <sup>a</sup>                                    | 16.2390714    | 2.17385387    | 4.10540044    | 1.74067205    | 1.35380267    | 0.23493046    | 1.74901782    | 2.24732631 |
| 6-leaf stage  | ZS11 <sup>b</sup>                                  | 2.93254936    | 1.81244546    | 1.9577692     | 3.84007519    | 0.77664362    | 8.40234753    | 1.72938158    | 3.58795434 |
|               | BC <sub>4</sub> F <sub>2:3</sub> (AA) <sup>c</sup> | 18.6670292    | 2.46192481    | 2.19552402    | 2.61473857    | 0.99717215    | 0.56200934    | 2.09554922    | 2.55406526 |
|               | BC <sub>4</sub> F <sub>2:3</sub> (aa) <sup>d</sup> | 21.1069919    | 2.07989673    | 1.85392328    | 3.07668286    | 1.14621484    | 4.94143563    | 2.06129199    | 3.59382363 |
|               | QU <sup>a</sup>                                    | 4.01521263    | 1.34845042    | 0.48968383    | 35.1033088    | 2.23613725    | 1.05538218    | 3.00163819    | 1.41623127 |
| budding stage | ZS11 <sup>b</sup>                                  | 40.4448793    | 2.06173897    | 0.76041871    | 3.70317788    | 0.32858491    | 7.43624565    | 0.99899488    | 2.17428479 |
|               | BC <sub>4</sub> F <sub>2:3</sub> (AA) <sup>c</sup> | 22.4629718    | 1.7762724     | 1.17313065    | 1.72086264    | 0.70586734    | 0.68854592    | 2.24290234    | 1.91339903 |
|               | BC <sub>4</sub> F <sub>2:3</sub> (aa) <sup>d</sup> | 25.3817143    | 1.67699937    | 1.49320088    | 1.67871908    | 0.61388725    | 5.36661967    | 2.14367124    | 2.46236186 |

**Additional file 9: Table S7.** Gene expression in the mapping interval on A02. (*Continued*)

|               | BnaA02g30300D            | BnaA02g30310D | BnaA02g30330D | BnaA02g30340D | BnaA02g30350D | BnaA02g30360D | BnaA02g30370D | BnaA02g30380D |            |
|---------------|--------------------------|---------------|---------------|---------------|---------------|---------------|---------------|---------------|------------|
|               | QU <sup>a</sup>          | 1             | 1             | 1             | 1             | 1             | 1             | 1             |            |
| 4-leaf stage  | ZS11 <sup>b</sup>        | 5.87162084    | 1.80022872    | 0.45151048    | 3.07247479    | 2.56165019    | 1.34120235    | 1.16869237    | 1.83326353 |
|               | BC4F2:3(AA) <sup>c</sup> | 0.9574239     | 1.04374082    | 0.1468235     | 2.19006861    | 1.78408093    | 1.20899937    | 1.4273856     | 1.77954522 |
|               | BC4F2:3(aa) <sup>d</sup> | 5.38977366    | 1.84747355    | 0.36712583    | 2.08761457    | 3.73451683    | 0.87018395    | 1.81011696    | 1.469689   |
|               | QU <sup>a</sup>          | 0.45755105    | 1.0666536     | 0.88857199    | 2.96063273    | 2.6962526     | 0.76181276    | 1.32446887    | 1.75469628 |
| 6-leaf stage  | ZS11 <sup>b</sup>        | 7.20027221    | 4.3385437     | 0.46757108    | 3.28618429    | 2.81433317    | 1.32912691    | 2.31797359    | 1.93931699 |
|               | BC4F2:3(AA) <sup>c</sup> | 0.89917614    | 1.3888694     | 0.16543537    | 4.79618047    | 2.96191512    | 1.03966016    | 2.02371357    | 2.47059421 |
|               | BC4F2:3(aa) <sup>d</sup> | 3.36953093    | 2.23411359    | 0.19118352    | 5.94963834    | 3.60042352    | 1.23700882    | 2.28549088    | 2.53779552 |
|               | QU <sup>a</sup>          | 2.40622805    | 1.26744045    | 222.291143    | 10.3311031    | 2.11886391    | 2.31016968    | 3.28741449    | 2.65606111 |
| budding stage | ZS11 <sup>b</sup>        | 1.46214542    | 1.55049512    | 11.0433294    | 2.69451053    | 1.49956607    | 2.02461459    | 1.16295125    | 2.12223443 |
|               | BC4F2:3(AA) <sup>c</sup> | 0.62155637    | 1.29499745    | 0.27049774    | 4.25734515    | 2.36363238    | 1.31166693    | 1.80883773    | 2.12508571 |
|               | BC4F2:3(aa) <sup>d</sup> | 2.76159414    | 1.75925846    | 0.37492042    | 4.46238167    | 2.8534598     | 1.38038813    | 1.74600484    | 2.4606394  |

**Additional file 9: Table S7.** Gene expression in the mapping interval on A02. (*Continued*)

|               | BnaA02g30300D            | BnaA02g30310D | BnaA02g30330D | BnaA02g30340D | BnaA02g30350D | BnaA02g30360D | BnaA02g30370D | BnaA02g30380D |            |
|---------------|--------------------------|---------------|---------------|---------------|---------------|---------------|---------------|---------------|------------|
|               | QU <sup>a</sup>          | 1             | 1             | 1             | 1             | 1             | 1             | 1             |            |
| 4-leaf stage  | ZS11 <sup>b</sup>        | 5.87162084    | 1.80022872    | 0.45151048    | 3.07247479    | 2.56165019    | 1.34120235    | 1.16869237    | 1.83326353 |
|               | BC4F2:3(AA) <sup>c</sup> | 0.9574239     | 1.04374082    | 0.1468235     | 2.19006861    | 1.78408093    | 1.20899937    | 1.4273856     | 1.77954522 |
|               | BC4F2:3(aa) <sup>d</sup> | 5.38977366    | 1.84747355    | 0.36712583    | 2.08761457    | 3.73451683    | 0.87018395    | 1.81011696    | 1.469689   |
|               | QU <sup>a</sup>          | 0.45755105    | 1.0666536     | 0.88857199    | 2.96063273    | 2.6962526     | 0.76181276    | 1.32446887    | 1.75469628 |
| 6-leaf stage  | ZS11 <sup>b</sup>        | 7.20027221    | 4.3385437     | 0.46757108    | 3.28618429    | 2.81433317    | 1.32912691    | 2.31797359    | 1.93931699 |
|               | BC4F2:3(AA) <sup>c</sup> | 0.89917614    | 1.3888694     | 0.16543537    | 4.79618047    | 2.96191512    | 1.03966016    | 2.02371357    | 2.47059421 |
|               | BC4F2:3(aa) <sup>d</sup> | 3.36953093    | 2.23411359    | 0.19118352    | 5.94963834    | 3.60042352    | 1.23700882    | 2.28549088    | 2.53779552 |
|               | QU <sup>a</sup>          | 2.40622805    | 1.26744045    | 222.291143    | 10.3311031    | 2.11886391    | 2.31016968    | 3.28741449    | 2.65606111 |
| budding stage | ZS11 <sup>b</sup>        | 1.46214542    | 1.55049512    | 11.0433294    | 2.69451053    | 1.49956607    | 2.02461459    | 1.16295125    | 2.12223443 |
|               | BC4F2:3(AA) <sup>c</sup> | 0.62155637    | 1.29499745    | 0.27049774    | 4.25734515    | 2.36363238    | 1.31166693    | 1.80883773    | 2.12508571 |
|               | BC4F2:3(aa) <sup>d</sup> | 2.76159414    | 1.75925846    | 0.37492042    | 4.46238167    | 2.8534598     | 1.38038813    | 1.74600484    | 2.4606394  |

<sup>a</sup> Male parent with *cqSPDA2*. <sup>b</sup> Female parent without *cqSPDA2*. <sup>c</sup> The homozygous dominant genotype with *cqSPDA2*. <sup>d</sup> The homozygous recessive genotype without *cqSPDA2*. The relative expression levels were calculated by the  $2^{-\Delta\Delta C_t}$  method based on the samples of QU and three replicates for each sample. The housekeeping gene Actin7 was used as the internal control.
