# Supplementary material for: Fine mapping of the QTL cqSPDA2 for chlorophyll content in Brassica napus L
Source: PubMed Central journal article supplement (PMC7654151; doi:10.1186/s12870-020-02710-y), 2020-11-09
Supplement: 12870_2020_2710_MOESM10_ESM.pdf [file 12870_2020_2710_MOESM10_ESM.pdf]

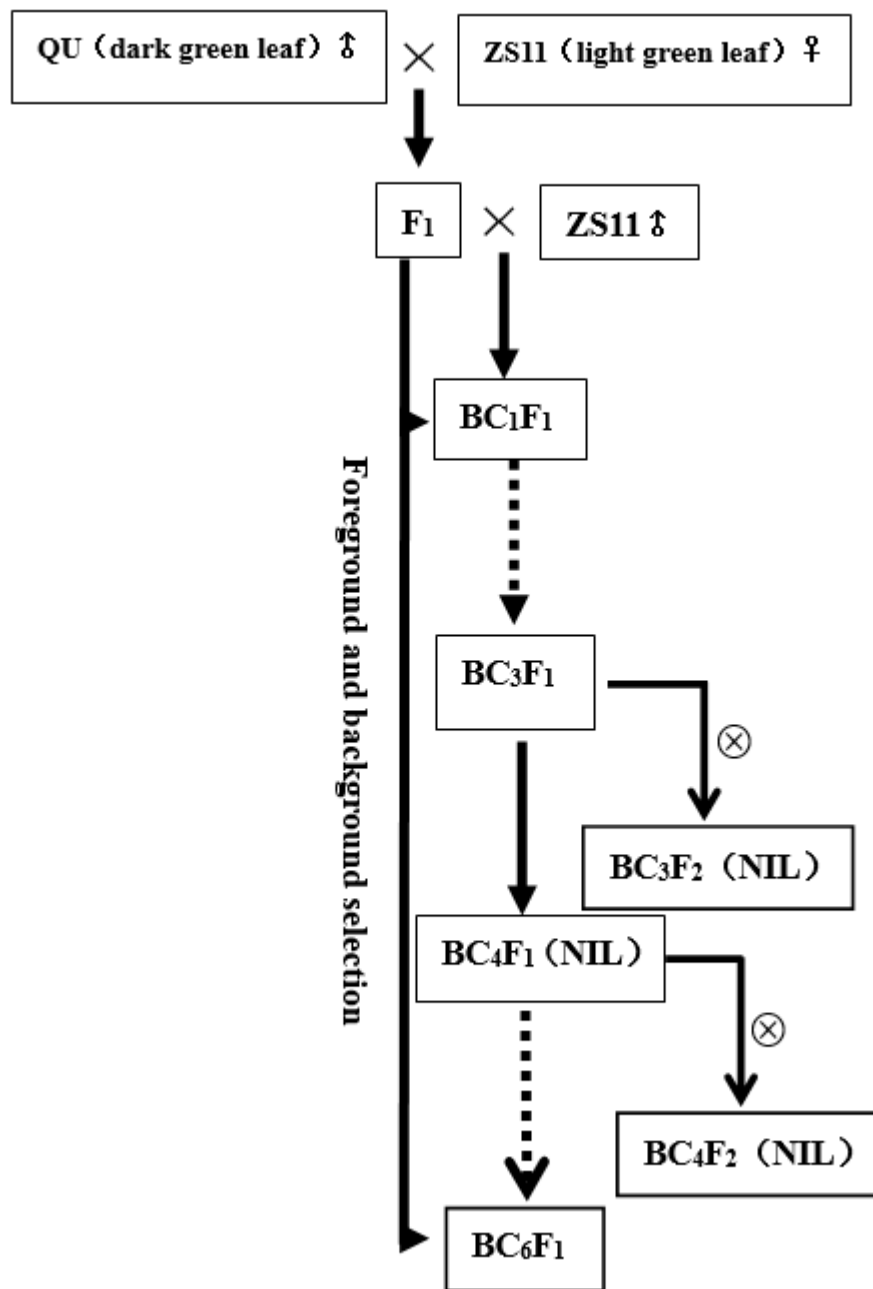

**Additional file 10: Figure S3** The scheme of NIL development for fine mapping.
